# Supplementary material for: Whole Exome Sequencing Reveals Mutations in Known Retinal Disease Genes in 33 out of 68 Israeli Families with Inherited Retinopathies
Source: PubMed Central journal article supplement (PMC4549705; doi:10.1038/srep13187), 2015-08-26

## **Supplementary Information**

### **Whole Exome Sequencing Reveals Mutations in Known Retinal Disease Genes in 33 out of 68 Israeli and Palestinian Families with Inherited Retinopathies**

Avigail Beryozkin<sup>1</sup>, Elia Shevah<sup>1</sup>, Adva Kimchi<sup>1</sup>, Liliana Mizrahi-Meissonnier<sup>1</sup>,  
Samer Khateb<sup>1</sup>, Rinki Ratnapriya<sup>2</sup>, Csilla H. Lazar<sup>2,3</sup>, Anat Blumenfeld<sup>1</sup>, Tamar Ben-  
Yosef<sup>4</sup>, Yitzhak Hemo<sup>1</sup>, Jacob Pe'er<sup>1</sup>, Eduard Averbuch<sup>1</sup>, Michal Sagi<sup>5</sup>, Alexis  
Boleda<sup>2</sup>, Linn Gieser<sup>2</sup>, Abraham Zlotogorski<sup>6</sup>, Tzipora Falik-Zaccai<sup>7</sup>, Ola Alimi-  
Kasem<sup>8</sup>, Samuel G. Jacobson<sup>9</sup>, Itay Chowers<sup>1</sup>, Anand Swaroop<sup>2\*</sup>, Eyal Banin<sup>1\*</sup>, Dror  
Sharon<sup>1\*</sup>

**Supplementary Table S1:** A list of 226 known IRD genes that were analyzed in this study by WES.

*ABCA4, ABCC6, ABHD12, ACBD5, ADAM9, ADAMTS18, AHI1, AIPL1, ALMS1, ARL2BP, ARL6, ARMS2, ATXN7, BBIP1, BBS1, BBS10, BBS12, BBS17, BBS2, BBS4, BBS5, BBS7, BBS9, BEST1, C1QTNF5, C2, C21orf2, C2orf71, C3, C8orf37, CA4, CABP4, CACNA1F, CACNA2D4, CAPN5, CC2D2A, CDH23, CDH3, CDHR1, CEP164, CEP250, CEP290, CERKL, CFB, CFH, CHM, CIB2, CLN3, CLRN1, CNGA1, CNGA3, CNGB1, CNGB3, CNNM4, COL11A1, COL2A1, COL9A1, CRB1, CRX, CSPP1, CYP4V2, DFNB31, DHDDS, DHX38, DMD, DTHD1, EFEMP1, ELOVL4, EMC1, ERCC6, EYS, FAM161A, FBLN5, FLVCR1, FSCN2, FZD4, GDF6, GNAT1, GNAT2, GNPTG, GPR125, GPR179, GPR98, GRK1, GRM6, GUCA1A, GUCA1B, GUCY2D, HARS, HK1, HMCN1, HMX1, HTRA1, IDH3B, IFT140, IFT172, IFT27, IMPDH1, IMPG1, IMPG2, INPP5E, INVS, IQCB1, ITM2B, JAG1, KCNJ13, KCNV2, KIAA1549, KIF11, KIZ, KLHL7, LAMA1, LCA5, LRAT, LRIT3, LRP5, LZTFL1, MAK, MERTK, MFRP, MKKS, MKS1, MTPP, MVK, MYO7A, NDP, NEK2, NEUROD1, NMNAT1, NPHP1, NPHP3, NPHP4, NR2E3, NRL, NYX, OAT, OFD1, OPN1LW, OPN1MW, OPN1SW, OTX2, PANK2, PAX2, PCDH15, PCYT1A, PDE6A, PDE6B, PDE6C, PDE6G, PDE6H, PDZD7, PEX1, PEX2, PEX7, PGK1, PHYH, PITPNM3, PLA2G5, PLK4, POC1B, PRCD, PROM1, PRPF3, PRPF31, PRPF4, PRPF6, PRPF8, PRPH2, PXMP3, RAB28, RAX2, RBP3, RBP4, RD3, RDH11, RDH12, RDH5, RGR, RGS9, RGS9BP, RHO, RIMS1, RLBP1, ROM1, RP1, RP1L1, RP2, RP9, RPE65, RPGR, RPGRIP1, RPGRIP1L, RS1, SAG, SDCCAG8, SEMA4A, SLC24A1, SLC7A14, SNRNP200, SPATA7, TEAD1, TIMP3, TLR3, TLR4, TMEM237, TOPORS, TREX1, TRIM32, TRPM1, TSPAN12, TTC8, TTL5, TTPA, TUB, TULP1, UNC119, USH1C, USH1G, USH2A, VCAN, WDPCP, WDR19, WFS1, ZNF408, ZNF423, ZNF513.*

**Supplementary Table S2:** Primers for all the suspected variants used in this study.

| GENE NAME      | FORWARD PRIMER                | REVERSE PRIMER               |
|----------------|-------------------------------|------------------------------|
| <b>ADAM9</b>   | GCAAAACATTTTCTTTGCGTTC        | CATTCCTGTTTTCCAATG           |
| <b>AIPL1</b>   | ATGGGGTGAAGTGAAGTGAAGC        | AGTTTGCAGGACTGGCTTTG         |
| <b>BBS1</b>    | GGGTGTAGACATTGGGTTTCC         | CCCTGGAGCCTCCCAAAC           |
| <b>CDHR1</b>   | CCTGATACAGACCAAGGACAACC       | GGAGCAGAGAGCTTTCTGGGCTG      |
| <b>CNGA1</b>   | GCCTTCCACTAATAAGACTTCTTC      | ATGCATGGGAAAATGTTTGG         |
| <b>CNGA1</b>   | AAGCTGGTCTGTTGGTGGAG          | TTCCATGAGGTCATCTTTGAG        |
| <b>CNGB1</b>   | TCCATGGAAGGGAGAGAC            | CCATCCCTTGAGGAACTC           |
| <b>CNGB1</b>   | TGACCTCCATAACCTTCC            | GAGTTGACTGGGAGCTGGTG         |
| <b>CNNM4</b>   | TAATGTTTTGGTTGAGGGAG          | AGCTAGGGACACCAAGTTTC         |
| <b>CYP4V2</b>  | CTTGATCCACATGTTCTTCTTTG       | AGAAACCCACCATCAAGTGG         |
| <b>C2ORF71</b> | AAACAGGACCTCAGAGTCCAGCC       | TTCTGGCCGAGCTGGGATTCATAA     |
| <b>FAM161A</b> | TGAGCATGGTGGCACAAG            | GCTGACCTACAAGGCAGAGG         |
| <b>MAK</b>     | AACGCTCCTTGAGAATGG            | ACACCTGGCCTGTTAAGC           |
| <b>NRL</b>     | GACCTGGCGCTGACCCGTTTCTGCATTCT | GCCACCCCAACAGCCCCACTACACCACA |
| <b>NR2E3</b>   | GAGGGGAGCGTGCAGCCCTG          | CACCCCTCCAGAACCCCTCAG        |
| <b>PDE6A</b>   | GGTGACTTTACTGCCAGCATC         | CATACATAAATCATTGTTGCT        |
| <b>PRPF3</b>   | AAGTGACTTCAAAGACTGATTGTTG     | CTCTTGATCCACACTAGGGTCA       |
| <b>PLA2G5</b>  | ATTAGGGATGGGGTCAGGAG          | CAGGCTGGCTGTTCTCTAGG         |
| <b>RDH5</b>    | CAGATGCTCCCAGGAAGAAG          | GAGTGGGCTGCTGTTAGTCC         |
| <b>RDH12</b>   | AATGCTCTGTCCCCAGTC            | CTCCATACCAATTTCTCTG          |
| <b>RDH12</b>   | GCTAGGGGACTCCTTGCTAAC         | AGGCCCTGGACATTCTC            |
| <b>RPE65</b>   | TGCAAATGATGGAGAAAATG          | TTTAGATGTGATTGAGATTGAGTGC    |
| <b>RP1</b>     | TTCAAGCCTAGGAGGTTGTTG         | ATTGAAGCATGGATTTTGCC         |
| <b>SPATA7</b>  | AAAAACCAATTTTCTATTTTGTCC      | GCCAAATCTGACCCAATGTC         |

|                |                           |                           |
|----------------|---------------------------|---------------------------|
| <b>TSPAN12</b> | TGACAGATATAGCTCTGGGTACAAA | GGAAAATTCATTGGCATATTG     |
| <b>TULP1</b>   | AATCACAGAGCTCCCCAGAG      | ACTGTGGTGGGTGCTCTACC      |
| <b>USH2A</b>   | AAGTATTGCTGGCAAGTGGC      | GATCTTCACTACTACTGGTTTTGGG |
| <b>USH2A</b>   | CACATCAAGAGTGCTTGCTTTC    | CACCGCCACTTACTTCTTCC      |
| <b>CDH3</b>    | TGCTGTAGTCTCTTTGGCCC      | GCTGGTTGGTGGTGGAGTC       |
| <b>CDHR1</b>   | TACCCCCATTGTGGTCTCT       | CAAGCCTACAGCTCTGGTTC      |
| <b>RPE65</b>   | GGGCTGGAAATGAAAATCAC      | GGCCCTACTTTGAGGAGGAG      |
| <b>RPE65</b>   | CCCTTTATTCTTCATGTTGTGC    | AGAGGCAATCAGTGCAGTCC      |

**Supplementary Table S3:** A list of published Israeli families with nonsyndromic IRDs

| Gene    | Retinal phenotype | Number of Families | Inheritance pattern | Reference     |
|---------|-------------------|--------------------|---------------------|---------------|
| ADAM9   | CRD               | 2                  | AR                  | <sup>1</sup>  |
| AIPL1   | LCA               | 5                  | AR                  | <sup>2</sup>  |
| ARL2BP  | RP                | 1                  | AR                  | <sup>3</sup>  |
| BBS1    | RP                | 4                  | AR                  | <sup>4</sup>  |
| CDHR1   | CRD               | 1                  | AR                  | <sup>5</sup>  |
|         |                   | 1                  |                     | <sup>6</sup>  |
| CEP290  | LCA               | 1                  | AR                  | <sup>7</sup>  |
| CERKL   | RP / CRD          | 7                  | AR                  | <sup>8</sup>  |
| CRB1    | Early RP          | 1                  | AR                  | <sup>9</sup>  |
|         |                   | 1                  |                     | <sup>10</sup> |
|         |                   | 15                 |                     | <sup>11</sup> |
| C2ORF71 | RP                | 2                  | AR                  | <sup>12</sup> |
|         |                   | 2                  |                     | <sup>13</sup> |
| C8ORF37 | RP                | 2                  | AR                  | <sup>14</sup> |
|         |                   | 1                  |                     | <sup>6</sup>  |
| DHDDS   | RP                | 15                 | AR                  | <sup>15</sup> |
| EYS     | RP                | 10                 | AR                  | <sup>16</sup> |
|         |                   | 1                  |                     | <sup>7</sup>  |
| FAM161A | RP                | 20                 | AR                  | <sup>16</sup> |
| GUCY2D  | LCA               | 4                  | AR                  | <sup>2</sup>  |
|         | CRD               | 6                  | AD                  | <sup>6</sup>  |
| IMPG2   | RP                | 2                  | AR                  | <sup>17</sup> |
| LCA5    | LCA               | 1                  | AR                  | <sup>7</sup>  |
| MAK     | RP                | 1                  | AR                  | <sup>18</sup> |
| MFRP    | RP                | 1                  | AR                  | <sup>7</sup>  |

|       |          |    |         |    |
|-------|----------|----|---------|----|
| NR2E3 | ESCS     | 10 | AR      | 19 |
|       | GFS, RP  | 2  |         | 7  |
| PDE6G | Early RP | 1  | AR      | 20 |
| PDE6B | RP       | 1  | AR      | 21 |
| PRCD  | RP       | 9  | AR      | 22 |
| PROM1 | CRD      | 1  | AR      | 7  |
|       |          | 1  |         | 23 |
| RAB28 | CRD      | 1  | AR      | 24 |
| RDH5  | AA       | 14 | AR      | 25 |
| RDH12 | Early RP | 7  | AR      | 7  |
|       |          | 1  |         | 10 |
| RPE65 | LCA/RP   | 10 | AR      | 2  |
| RPGR  | RP       | 1  | X-lined | 26 |
| TULP1 | Early RP | 1  | AR      | 7  |
|       |          | 2  |         | 27 |
| USH1C | RP       | 9  | AR      | 28 |
| USH2A | RP       | 1  | AR      | 29 |

The list includes phenotypes that were studied in the current study (mainly nonsyndromic RP, LCA, and CRD). Syndromic forms (mainly Usher syndrome and Bardet-Biedl syndrome) and maculopathies (mainly Stargardt disease and Best disease) were excluded from this table. Abbreviations: RP- Retinitis pigmentosa, CRD- Cone-rod degeneration, LCA- Leber congenital amaurosis, ESCS- Enhanced S-cone syndrome, GFS- Goldmann-Favre syndrome, AA- Albipunctata albescens.

## References:

- 1 Parry, D. A. *et al.* Loss of the metalloprotease ADAM9 leads to cone-rod dystrophy in humans and retinal degeneration in mice. *American journal of human genetics* **84**, 683-691 (2009).
- 2 Banin, E. *et al.* Molecular anthropology meets genetic medicine to treat blindness in the North African Jewish population: human gene therapy initiated in Israel. *Human gene therapy* **21**, 1749-1757 (2010).
- 3 Davidson, A. E. *et al.* Mutations in ARL2BP, encoding ADP-ribosylation-factor-like 2 binding protein, cause autosomal-recessive retinitis pigmentosa. *American journal of human genetics* **93**, 321-329 (2013).
- 4 Shevach, E. *et al.* Missense mutations in the BBS2 gene can be associated with nonsyndromic retinitis pigmentosa. *JAMA Ophthalmol (in press)* (2014).
- 5 Cohen, B. *et al.* A novel splice site mutation of CDHR1 in a consanguineous Israeli Christian Arab family segregating autosomal recessive cone-rod dystrophy. *Molecular vision* **18**, 2915-2921 (2012).
- 6 Lazar, C. H. *et al.* Whole exome sequencing reveals GUCY2D as a major gene associated with cone and cone-rod dystrophy in Israel. *Invest Ophthalmol Vis Sci* (2014).
- 7 Beryozkin, A. *et al.* Identification of mutations causing inherited retinal degenerations in the israeli and palestinian populations using homozygosity mapping. *Investigative ophthalmology & visual science* **55**, 1149-1160 (2014).
- 8 Auslender, N. *et al.* A common founder mutation of CERKL underlies autosomal recessive retinal degeneration with early macular involvement

- among Yemenite Jews. *Investigative ophthalmology & visual science* **48**, 5431-5438 (2007).
- 9 Gerber, S. *et al.* A novel mutation disrupting the cytoplasmic domain of CRB1 in a large consanguineous family of Palestinian origin affected with Leber congenital amaurosis. *Ophthalmic genetics* **23**, 225-235 (2002).
- 10 Benayoun, L. *et al.* Genetic heterogeneity in two consanguineous families segregating early onset retinal degeneration: the pitfalls of homozygosity mapping. *American journal of medical genetics. Part A* **149A**, 650-656 (2009).
- 11 Beryozkin, A. *et al.* Mutations in CRB1 are a Relatively Common Cause of Autosomal Recessive Early-Onset Retinal Degeneration in the Israeli and Palestinian Populations. *Invest Ophthalmol Vis Sci* (2013).
- 12 Collin, R. W. *et al.* Mutations in C2ORF71 cause autosomal-recessive retinitis pigmentosa. *American journal of human genetics* **86**, 783-788 (2010).
- 13 Khateb, S. *et al.* A homozygous nonsense CEP250 mutation combined with a heterozygous nonsense C2orf71 mutation is associated with atypical Usher syndrome. *J Med Genet* **51**, 460-469 (2014).
- 14 Estrada-Cuzcano, A. *et al.* Mutations in C8orf37, Encoding a Ciliary Protein, are Associated with Autosomal-Recessive Retinal Dystrophies with Early Macular Involvement. *American journal of human genetics* (2011).
- 15 Zelinger, L. *et al.* A missense mutation in DHDDS, encoding dehydrodolichyl diphosphate synthase, is associated with autosomal-



- recessive retinitis pigmentosa in Ashkenazi Jews. *American journal of human genetics* **88**, 207-215 (2011).
- 16 Bandah-Rozenfeld, D. *et al.* Homozygosity mapping reveals null mutations in FAM161A as a cause of autosomal-recessive retinitis pigmentosa. *American journal of human genetics* **87**, 382-391 (2010).
- 17 Bandah-Rozenfeld, D. *et al.* Mutations in IMPG2, Encoding Interphotoreceptor Matrix Proteoglycan 2, Cause Autosomal-Recessive Retinitis Pigmentosa. *American journal of human genetics* **87**, 199-208 (2010).
- 18 Ozgul, R. K. *et al.* Exome Sequencing and cis-Regulatory Mapping Identify Mutations in MAK, a Gene Encoding a Regulator of Ciliary Length, as a Cause of Retinitis Pigmentosa. *American journal of human genetics* **89**, 253-264 (2011).
- 19 Bandah, D., Merin, S., Ashhab, M., Banin, E. & Sharon, D. The spectrum of retinal diseases caused by NR2E3 mutations in Israeli and Palestinian patients. *Archives of ophthalmology* **127**, 297-302 (2009).
- 20 Dvir, L. *et al.* Autosomal-recessive early-onset retinitis pigmentosa caused by a mutation in PDE6G, the gene encoding the gamma subunit of rod cGMP phosphodiesterase. *American journal of human genetics* **87**, 258-264 (2010).
- 21 Goldenberg-Cohen, N. *et al.* Genetic heterogeneity and consanguinity lead to a "double hit": homozygous mutations of MYO7A and PDE6B in a patient with retinitis pigmentosa. *Mol Vis* **19**, 1565-1571 (2013).

- 22 Nevet, M. J., Shalev, S. A., Zlotogora, J., Mazzawi, N. & Ben-Yosef, T. Identification of a prevalent founder mutation in an Israeli Muslim Arab village confirms the role of PRCD in the aetiology of retinitis pigmentosa in humans. *Journal of medical genetics* **47**, 533-537 (2010).
- 23 Pras, E. *et al.* Cone-rod dystrophy and a frameshift mutation in the PROM1 gene. *Molecular vision* **15**, 1709-1716 (2009).
- 24 Roosing, S. *et al.* Mutations in RAB28, encoding a farnesylated small GTPase, are associated with autosomal-recessive cone-rod dystrophy. *American journal of human genetics* **93**, 110-117 (2013).
- 25 Pras, E. *et al.* Fundus albipunctatus: novel mutations and phenotypic description of Israeli patients. *Molecular vision* **18**, 1712-1718 (2012).
- 26 Banin, E. *et al.* A non-ancestral missense mutation in families with either recessive or semi-dominant X-linked retinitis pigmentosa. *American Journal of Medical Genetics Part A* **143A**, 1150-1158 (2007).
- 27 Abbasi, A. H., Garzozzi, H. J. & Ben-Yosef, T. A novel splice-site mutation of TULP1 underlies severe early-onset retinitis pigmentosa in a consanguineous Israeli Muslim Arab family. *Molecular vision* **14**, 675-682 (2008).
- 28 Khateb, S. *et al.* Exome sequencing identifies a founder frameshift mutation in an alternative exon of USH1C as the cause of autosomal recessive retinitis pigmentosa with late-onset hearing loss. *PloS one* **7**, e51566 (2012).
- 29 Kaiserman, N., Obolensky, A., Banin, E. & Sharon, D. Novel USH2A mutations in Israeli patients with retinitis pigmentosa and Usher syndrome type 2. *Arch Ophthalmol* **125**, 219-224 (2007).



### Supplementary Figure S1: Pedigrees with identified disease-causing mutations

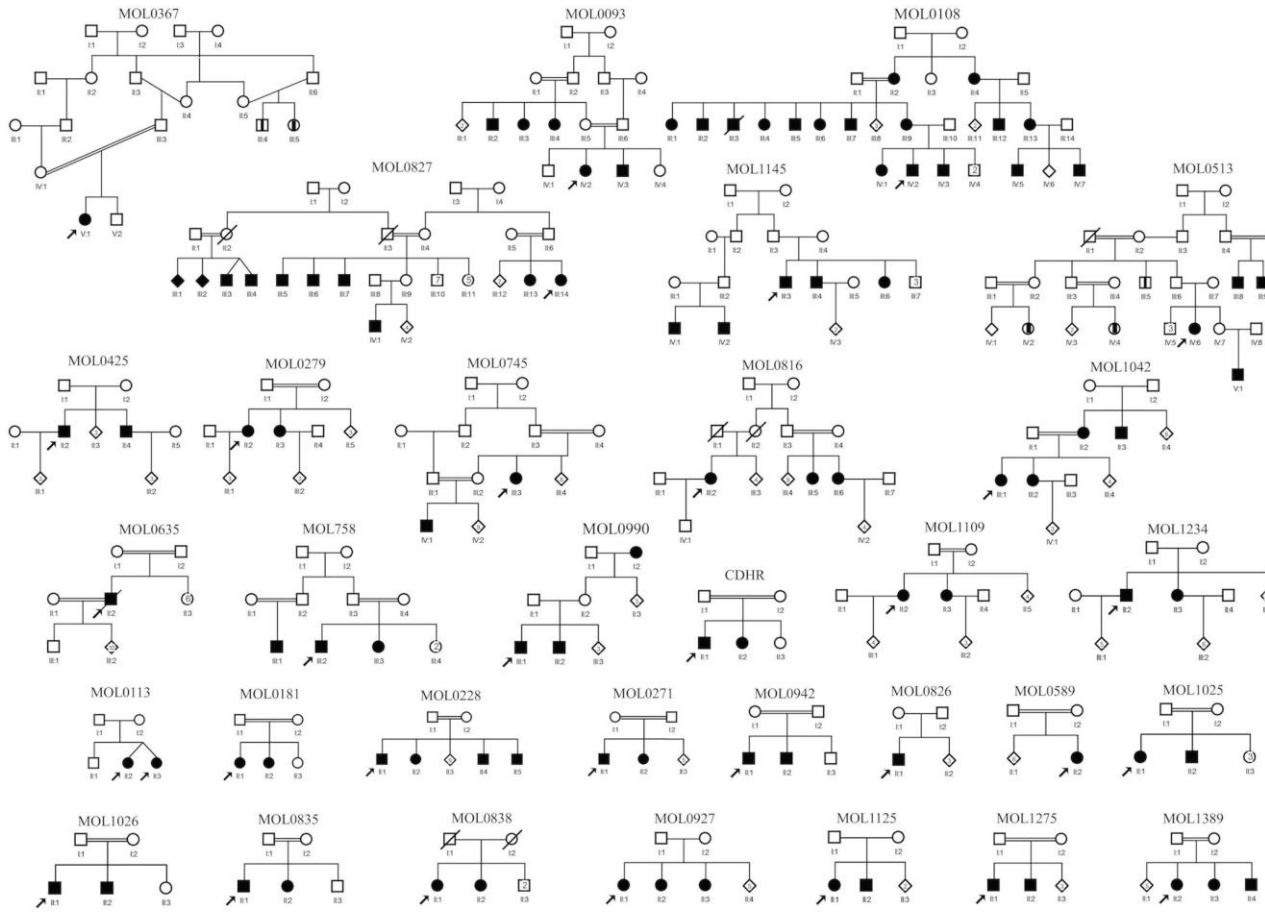

Supplement: srep13187-s1.pdf [file srep13187-s1.pdf]
